# Supplementary material for: A whole genome scan of SNP data suggests a lack of abundant hard selective sweeps in the genome of the broad host range plant pathogenic fungus Sclerotinia sclerotiorum
Source: PubMed Central journal article supplement (PMC6438532; doi:10.1371/journal.pone.0214201), 2019-03-28
Supplement: pone.0214201.s001.pdf [file pone.0214201.s001.pdf]

Upper limit for depth filtering (150 x)

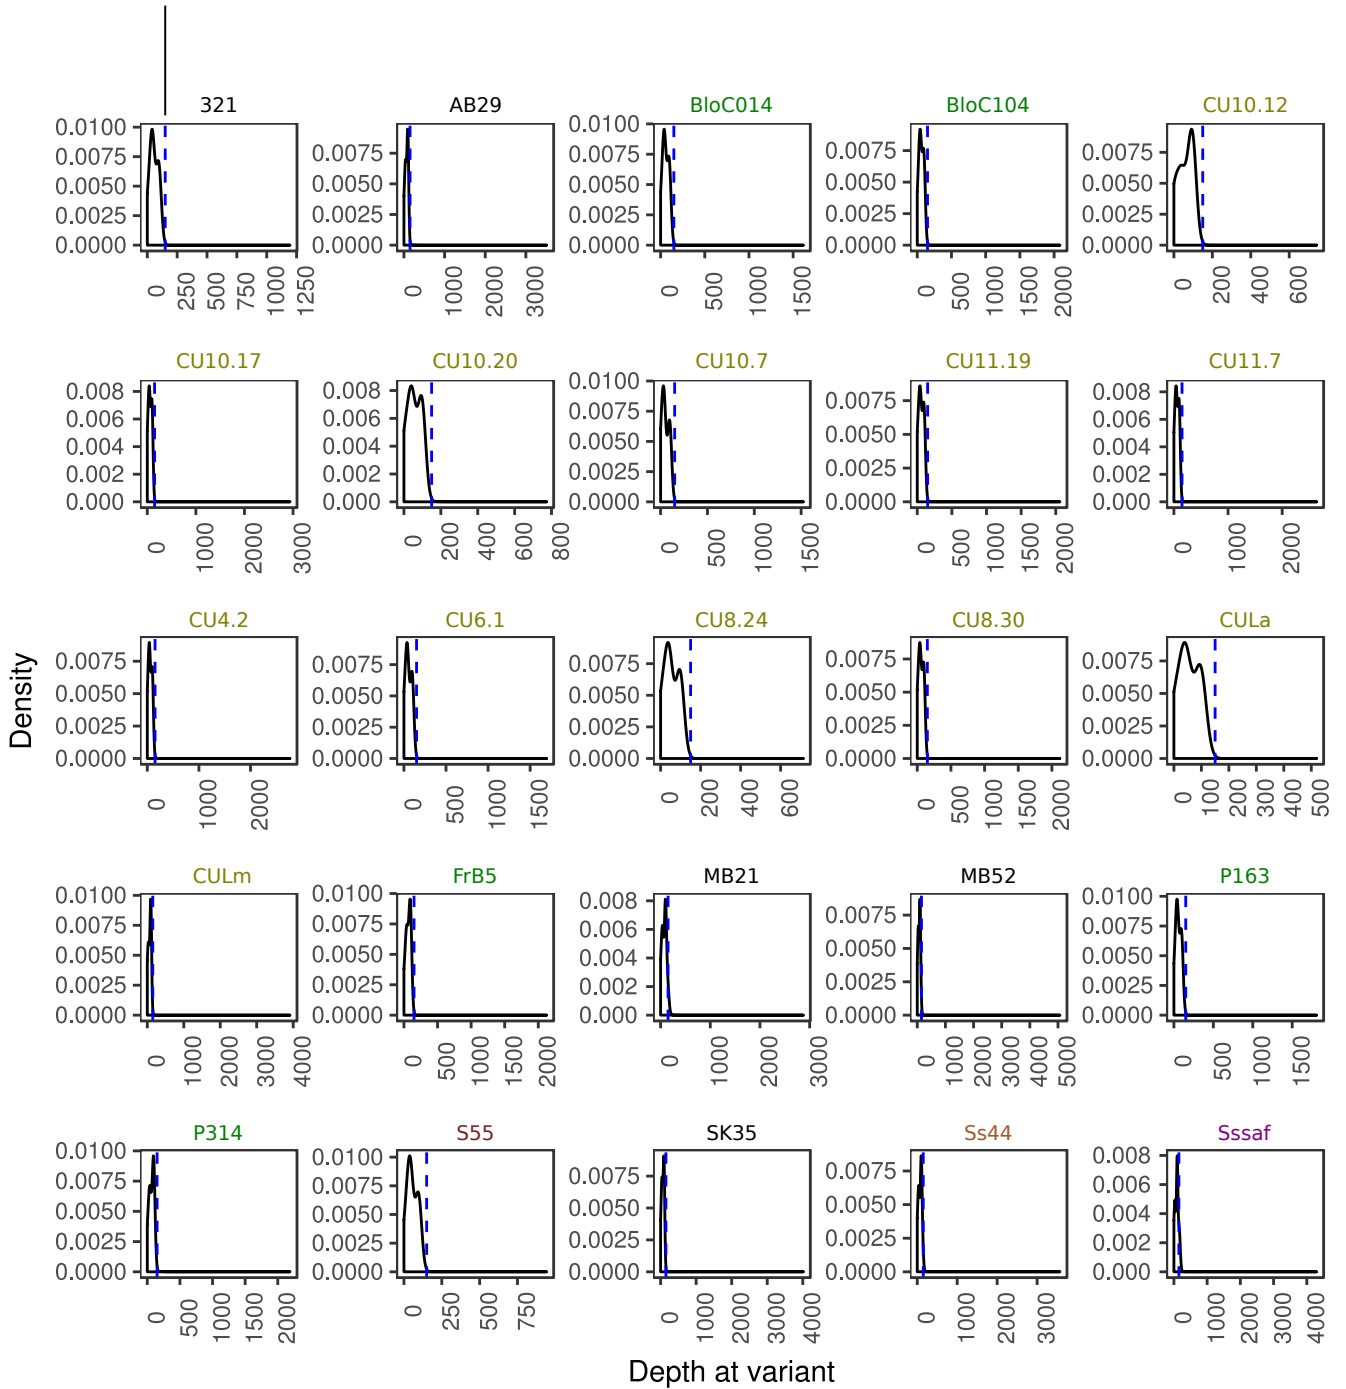

*Sclerotinia sclerotiorum*  
*Sclerotinia minor*  
*Sclerotinia trifoliorum*  
*Sclerotinia nivalis*

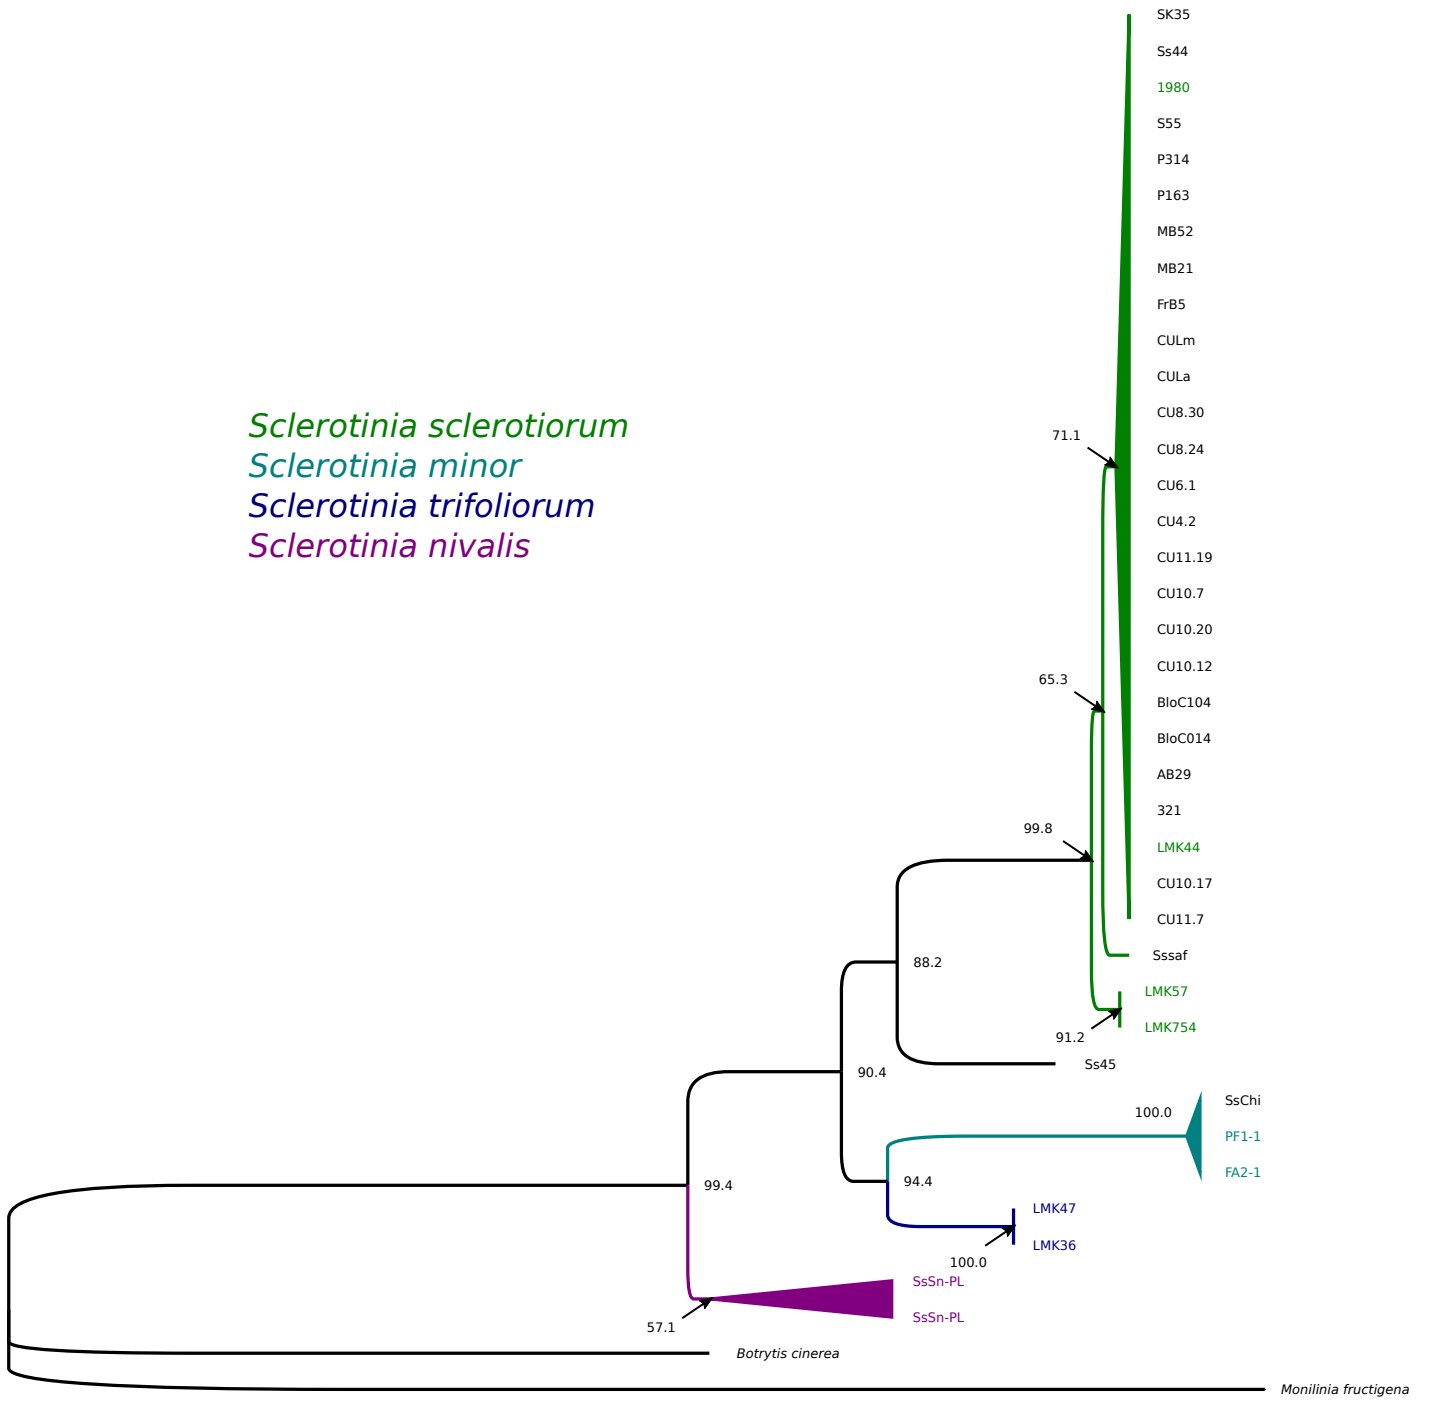

0.02
